# Supplementary material for: A regression-based machine learning approach for pH and glucose detection with redox-sensitive colorimetric paper sensors
Source: Royal Society of Chemistry journal article supplement (doi:10.1039/d2ay01329k), 2022-01-01
Supplement: d2ay01329k1.pdf [file d2ay01329k1.pdf]

## Supplementary Information

# A Regression-Based Machine Learning Approach for pH and Glucose Detection with Redox-Sensitive Colorimetric Paper Sensors

Taeha Lee<sup>a,b,1</sup>, Hyung-Tak Lee<sup>b,c,1</sup>, Jiho Hong<sup>a</sup>, Seokbeom Roh<sup>a,b</sup>, Da Yeon Cheong<sup>a,b</sup>, Kyungwon Lee<sup>a</sup>, Yeojin Choi<sup>a</sup>, Yoochan Hong<sup>d</sup>, Han-Jeong Hwang<sup>b,c,\*</sup>, Gyudo Lee<sup>a,b,\*</sup>

<sup>a</sup>. Department of Biotechnology and Bioinformatics, Korea University, Sejong 30019, South Korea

<sup>b</sup>. Interdisciplinary Graduate Program for Artificial Intelligence Smart Convergence Technology, Korea University, Sejong 30019, South Korea

<sup>c</sup>. Department of Electronics and Information Engineering, Korea University, Sejong 30019, South Korea

<sup>d</sup>. Department of Medical Device, Korea Institute of Machinery and Materials, Daegu 42994, South Korea

<sup>1</sup> These authors contributed equally to this work.

\*Corresponding author: G.L. (E-mail: lkd0807@korea.ac.kr); H-J.H. (E-mail: hwanghj@korea.ac.kr)

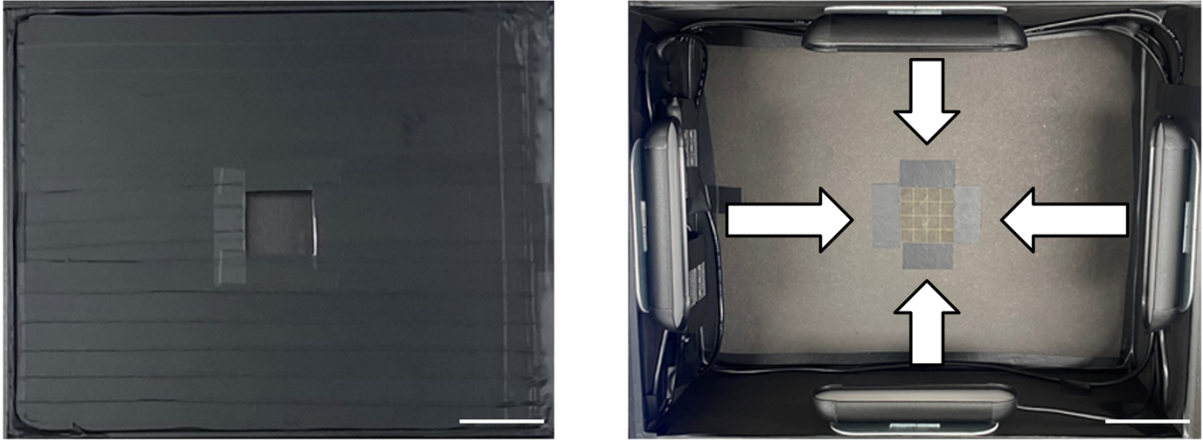

**Figure S1.** Exterior (left) and interior (right) photos of the homemade darkroom. Scale bar, 5 cm.

**Table S1.** Percentages of recovery and RSD of pH ( $n=110$ ) and glucose ( $n=79$ )

| pH | Recovery (%) | RSD ( $n=110$ ) (%) | Glucose (mg/mL) | Recovery (%) | RSD ( $n=79$ ) (%) |
|----|--------------|---------------------|-----------------|--------------|--------------------|
| 2  | 102.5        | 8.8                 | 0               | N/A          | 176.5              |
| 4  | 99.8         | 6.3                 | 0.1             | 270          | 85.2               |
| 6  | 99.8         | 3.5                 | 1               | 120          | 85                 |
| 8  | 107.8        | 7.0                 | 5               | 92.2         | 36.4               |
| 10 | 92.8         | 6.3                 | 10              | 94.7         | 12.4               |

Through this study, we know that wide range detection of glucose is difficult with a colorimetric paper sensor. In order to accurately detect a low concentration of glucose, it is necessary to optimize the performance of the paper sensor accordingly. If machine learning (ML) is applied to the optimized paper sensor, better recovery and RSD values can be obtained. In this regard, further study is needed.

| Year | Materials                                | Target analytes               | Detection range                           | Best model | Extracted value | Self-manufactured sensor? | Accuracy (%)                    | Ref.      |
|------|------------------------------------------|-------------------------------|-------------------------------------------|------------|-----------------|---------------------------|---------------------------------|-----------|
| 2017 | pH indicator strip                       | pH                            | pH: 4–9                                   | LS-SVM     | RGB             | No                        | 97.2                            | 1         |
| 2018 | Quantofix Peroxide 100                   | H <sub>2</sub> O <sub>2</sub> | H <sub>2</sub> O <sub>2</sub> : 0–100 ppm | LS-SVM     | LAB             | No                        | 90                              | 2         |
| 2021 | μPAD                                     | Glucose                       | Glucose: 0–10 mM                          | LDA        | RGB             | Yes                       | 98.2                            | 3         |
| 2022 | PPS <sup>1)</sup> and GPPS <sup>2)</sup> | pH and glucose                | pH: 2–10<br>Glucose: 0–56 mM              | RFR        | RGB             | Yes                       | 95.7 for pH<br>92.2 for glucose | This work |

**Table S2.** Comparison of various methods with our work regarding the ML-based colorimetric detection

<sup>1)</sup> PPS: PAAni paper sensor; <sup>2)</sup> GPPS: GOx-embedded PPS

1. A. Y. Mutlu, V. Kılıç, G. K. Özdemir, A. Bayram, N. Horzum and M. E. Solmaz, *Analyst*, 2017, **142**, 2434-2441.
2. M. E. Solmaz, A. Y. Mutlu, G. Alankus, V. Kılıç, A. Bayram and N. Horzum, *Sensors and Actuators B: Chemical*, 2018, **255**, 1967-1973.
3. Ö. B. Mercan, V. Kılıç and M. Şen, *Sensors and Actuators B: Chemical*, 2021, **329**, 129037.

## References
